# Supplementary material for: The Dantu blood group prevents parasite growth in vivo: Evidence from a controlled human malaria infection study
Source: eLife. 2023 Jun 13;12:e83874. doi: 10.7554/eLife.83874 (PMC10264070; doi:10.7554/eLife.83874)
Supplement: Figure 2—source data 2. [file elife-83874-fig2-data2.xlsx]

## Sheet: Sheet1
Figure 2 Table	Variant	Genotype	Proportion reaching 500 parasites/µl (n/N)	Overall p-value
	Dantu	AA	25/111 (22.5%)	0.01
		AG	0/27 (0.0%)
		GG	0/3 (0.0%)
	G6PD828	CC	20/110 (18.2%)	0.505
		CT	4/17 (23.5%)
		TT	1/15 (6.7%)
	ABO	non-O	13/64 (20.3%)	0.517
		O	12/75 (16.0%)
	⍺-Thalassaemia	Norm	6/48 (12.5%)	0.408
		Het	14/70 (20.0%)
		Homo	5/21 (23.8%)
	ATP2B4	GG	11/62 (17.7%)	0.876
		AG	11/57 (19.3%)
		AA	3/23 (13.0%)
