# Supplementary material for: The Dantu blood group prevents parasite growth in vivo: Evidence from a controlled human malaria infection study
Source: eLife. 2023 Jun 13;12:e83874. doi: 10.7554/eLife.83874 (PMC10264070; doi:10.7554/eLife.83874)
Supplement: Figure 4—source data 2. [file elife-83874-fig4-data2.xlsx]

## Sheet: Sheet1
Figure 4 Table	Dantu genotype	Non-Dantu	Dantu Heterozygous	Dantu Homozygous	P-value overall	P-value Homozygous Reference vs Heterozygous	P-value Homozygous Reference vs Homozygous Derived
	n/N (%)	86/111 (77.5%)	20/27 (74.1%)	2/3 (66.7%)	0.745	0.125	0.258
	Maximum Parasitaemia	9694	411	3	0.020*	0.028*	0.141
	Median Parasitaemia	112	13	2	0.144	0.108	0.256
