# Supplementary material for: The Dantu blood group prevents parasite growth in vivo: Evidence from a controlled human malaria infection study
Source: eLife. 2023 Jun 13;12:e83874. doi: 10.7554/eLife.83874 (PMC10264070; doi:10.7554/eLife.83874)
Supplement: Figure 5—source data 3. [file elife-83874-fig5-data3.xlsx]

## Sheet: Sheet1
Figure 5b Table		Overall comparison across genotype groups			Homozygous reference vs Heterozygous			Homozygous reference vs Homozygous derived
	Variant	Hazard ratio	95% - CI	P-value	Hazard ratio	95% - CI	P-value	Hazard ratio	95% - CI	P-value
	Dantu	0.342697	0.15 - 0.77	0.00982451	0.4	0.17 - 0.95	0.0370072	2.34605e-07	0.00 - Inf	0.995744
	G6PD +202	0.765812	0.49 - 1.20	0.241672	2.13735	0.89- 5.13	0.089112	0.30438	0.09 - 1.05	0.0588032
	ABO	0.689319	0.40 - 1.19	0.184757	0.778208	0.44 - 1.39	0.396175	-	-	-
	⍺-Thalassaemia	0.891561	0.58 - 1.38	0.603604	0.73	0.39 - 1.35	0.314	0.91	0.36 - 2.29	0.838333
	ATP2B4	0.966311	0.63 - 1.49	0.876507	0.58	0.30 - 1.12	0.106429	1.15	0.47 - 2.83	0.753137
